# Supplementary material for: Enhancing wheat production and quality in alkaline soil: a study on the effectiveness of foliar and soil applied zinc
Source: PeerJ. 2023 Nov 3;11:e16179. doi: 10.7717/peerj.16179 (PMC10629380; doi:10.7717/peerj.16179)
Supplement: Supplemental Information 1 [file peerj-11-16179-s001.xlsx]

## Sheet: Soil P
						SOIL P
				Soil Zn+Foliar Zn		R1	R2	R3	Mean			3.6533 b
					0+0	3.75	3.48	3.73	3.65333			3.9100 b					11 5.6700 A
					5+0	3.84	4.15	3.74	3.91			4.8300 ab					10 5.5933 A
					3.75+1.25	4.58	4.74	5.17	4.83			3.5267 b					9 4.9300 AB
					2.50+2.50	3.56	3.74	3.28	3.52667			3.6867 b					3 4.8300 AB
					1.25+3.75	3.68	3.7594	3.62	3.68647			3.7000 b					8 4.6200 AB
					0+5.00	3.58	3.78	3.74	3.7			4.0300 b					7 4.0300 B
					10+0.00	2.4796	4.105	5.4996	4.02807			4.6200 ab					2 3.9100 B
					7.25+2.50	4.62	4.38	4.86	4.62			4.9300 ab					6 3.7000 B
					5.00+5.00	4.78	4.8854	5.1158	4.92707			5.5933 a					5 3.6867 B
					2.50+7.50	6.357	3.158	7.256	5.59033			5.6700 a					1 3.6533 B
					0+10.00	4.76	6.56	5.69	5.67								4 3.5267 B

## Sheet: Soil K
						Soil K
				Soil Zn+Foliar Zn		R1	R2	R3	Mean			50.713 e				8 70.907 A
					0+0	50.54	52.43	49.17	50.7133			51.190 e				9 69.883 A
					5+0	52.76	50.07	50.74	51.19			51.793 e				11 69.713 A
					3.75+1.25	53.26	50.67	51.45	51.7933			52.870 e				10 64.550 B
					2.50+2.50	52.32	52.75	53.54	52.87			52.683 e				7 61.207 C
					1.25+3.75	53.12	51.78	53.15	52.6833			56.310 d				6 56.310 D
					0+5.00	57.35	56.76	54.82	56.31			61.207 c				4 52.870 E
					10+0.00	62.43	59.46	61.73	61.2067			70.907 a				5 52.683 E
					7.25+2.50	72.15	70.45	70.12	70.9067			69.883 a				3 51.793 E
					5.00+5.00	69.63	68.34	71.68	69.8833			64.550 b				2 51.190 E
					2.50+7.50	69.74	63.28	60.63	64.55			69.713 a				1 50.713 E
					0+10.00	69.37	69.35	70.42	69.7133
					Composit	54.4
											Lsd	2.9397

## Sheet: Soil Zn
						Soil Zn
				Soil Zn+Foliar Zn		R1	R2	R3	Mean
					0+0	0.49	0.53	0.51	0.51				0.5100 f				8 0.6900 A
					5+0	0.57	0.62	0.56	0.583333				0.5833 e				7 0.6567 AB
					3.75+1.25	0.59	0.59	0.58	0.586667				0.5867 de				6 0.6367 BC
					2.50+2.50	0.58	0.62	0.62	0.606667				0.6067 cde				10 0.6333 BC
					1.25+3.75	0.63	0.59	0.63	0.616667				0.6167 cde				9 0.6233 BCD
					0+5.00	0.45	0.53	0.48	0.486667				0.6367 bc				5 0.6167 CDE
					10+0.00	0.69	0.63	0.65	0.656667				0.6567 ab				4 0.6067 CDE
					7.25+2.50	0.72	0.67	0.68	0.69				0.6900 a				11 0.5933 DE
					5.00+5.00	0.62	0.64	0.61	0.623333				0.6233 bcd				3 0.5867 DE
					2.50+7.50	0.62	0.65	0.63	0.633333				0.6333 bc				2 0.5833 E
					0+10.00	0.52	0.49	0.51	0.506667				0.5933 de				1 0.5100 F
					Composit	0.606
														8 0.6900 A
									0.5100 e					7 0.6567 AB
									0.5833 d					10 0.6333 BC
									0.5867 d					9 0.6233 BCD
									0.6067 cd					5 0.6167 BCD
									0.6167 bcd					4 0.6067 CD
									0.4867 e					3 0.5867 D
									0.6567 ab					2 0.5833 D
									.6900 a					1 0.5100 E
									0.6233 bcd					11 0.5067 E
									0.6333 bc					6 0.4867 E
									0.5067 e
									0.0426

## Sheet: B.Y
						biological	yield	kg/ha
			Treatment			R1	R2	R3	Mean
			Control			6034	5992	6074	6033.33
			Soil Zn5+Foliar Zn0			6424	6320	6523	6422.33
			Soil Zn3.75+Foliar Zn1.25			6872	6917	6976	6921.67
			SoilZn2.5+Foliar Zn2.5			7028	6948	7128	7034.67
			Soil Zn1.25+Foliar Zn3.75			7192	7324	7224	7246.67
			Soil Zn0+ Foliar Zn5			7412	7329	7422	7387.67
			Soil Zn10+Foliar Zn0			7516	7710	7667	7631
			Soil Zn7.25+Foliar Zn2.50			8029	7840	8138	8002.33
			Soil Zn5.00+Foliar Zn5.00			7929	7969	8084	7994
			Soil Zn2.50+Foliar Zn7.50			7841	7985	7845	7890.33
			Soil Zn0+ Foliar Zn10	0+10.00		7629	7846	7884	7786.33

## Sheet: G.Y
							Grain yield
				Treatment			R1	R2	R3	Mean
				Control			2691	2754	2693	2712.67		44.5973	45.9613	44.3365
				Soil Zn5+Foliar Zn0			2956	2816	3012	2928		46.0149	44.557	46.1751
				Soil Zn3.75+Foliar Zn1.25			3195	3056	3139	3130		46.493	44.181	44.9971
				SoilZn2.5+Foliar Zn2.5			3164	3289	3258	3237		45.0199	47.3374	45.7071
				Soil Zn1.25+Foliar Zn3.75			3173	3289	3295	3252.33		44.1185	44.9072	45.6118
				Soil Zn0+ Foliar Zn5			3482	3393	3259	3378		46.9779	46.2955	43.91
				Soil Zn10+Foliar Zn0			3521	3472	3371	3454.67		46.8467	45.0324	43.9677
				Soil Zn7.25+Foliar Zn2.50			3628	3594	3697	3639.67		45.1862	45.8418	45.4289
				Soil Zn5.00+Foliar Zn5.00			3572	3683	3571	3608.67		45.0498	46.2166	44.1737
				Soil Zn2.50+Foliar Zn7.50			3578	3624	3562	3588		45.6319	45.3851	45.4047
				Soil Zn0+ Foliar Zn10	0+10.00		3562	3427	3523	3504		46.6903	43.6783	44.6854

## Sheet: 1000 G.W
							1000 grain	weight
				Treatment		R1	R2	R3	Mean			40.357 c				8 48.373 A
				Control		39.52	40.32	41.23	40.3567			43.573 bc				7 47.470 AB
				Soil Zn5+Foliar Zn0		40.1	42.62	48	43.5733			45.113 ab				6 47.380 AB
				Soil Zn3.75+Foliar Zn1.25		46.78	46.95	41.61	45.1133			46.077 ab				9 47.147 AB
				SoilZn2.5+Foliar Zn2.5		43.84	45.86	48.53	46.0767			46.677 ab				11 47.010 AB
				Soil Zn1.25+Foliar Zn3.75		46.64	47.45	45.94	46.6767			47.380 ab				5 46.677 AB
				Soil Zn0+ Foliar Zn5		49.1	42.89	50.15	47.38			47.470 ab				4 46.077 AB
				Soil Zn10+Foliar Zn0		49.34	45.84	47.23	47.47			48.373 a				10 45.377 AB
				Soil Zn7.25+Foliar Zn2.50		49.82	46.35	48.95	48.3733			47.147 ab				3 45.113 AB
				Soil Zn5.00+Foliar Zn5.00		46.76	47.34	47.34	47.1467			45.377 ab				2 43.573 BC
				Soil Zn2.50+Foliar Zn7.50		46.34	42.43	47.36	45.3767			47.010 ab				1 40.357 C
				Soil Zn0+ Foliar Zn10	0+10.00	46.32	47.37	47.34	47.01

## Sheet: Grain K
						K in Grains
			Treatment			R1	R2	R3	Mean				7 0.5263 A			0.5067 bc
			Control			0.503	0.515	0.502	0.506667				2 0.5130 AB			0.5130 ab
			Soil Zn5+Foliar Zn0			0.519	0.511	0.509	0.513				8 0.5077 BC			0.4913 de
			Soil Zn3.75+Foliar Zn1.25			0.496	0.49	0.488	0.491333				1 0.5067 BC			0.4867 ef
			SoilZn2.5+Foliar Zn2.5			0.488	0.481	0.491	0.486667				11 0.5063 BC			0.4730 f
			Soil Zn1.25+Foliar Zn3.75			0.473	0.482	0.464	0.473				9 0.5050 BCD			0.4917 de
			Soil Zn0+ Foliar Zn5			0.483	0.493	0.499	0.491667				10 0.4943 CDE			0.5263 a
			Soil Zn10+Foliar Zn0			0.516	0.527	0.536	0.526333				6 0.4917 DE			0.5077 bc
			Soil Zn7.25+Foliar Zn2.50			0.509	0.497	0.517	0.507667				3 0.4913 DE			0.5050 bcd
			Soil Zn5.00+Foliar Zn5.00			0.492	0.518	0.505	0.505				4 0.4867 EF			0.4943 cde
			Soil Zn2.50+Foliar Zn7.50			0.495	0.489	0.499	0.494333				5 0.4730 F			0.5063 bc
			Soil Zn0+ Foliar Zn10	0+10.00		0.5	0.503	0.516	0.506333
										LSD	0.014

## Sheet: Grain P
						P in Grains
			Treatment			R1	R2	R3	Mean
			Control			0.095718	0.126	0.142	0.121239			0.1213 c
			Soil Zn5+Foliar Zn0			0.13996	0.132	0.1189	0.130287			0.1303 bc					11 0.1557 A
			Soil Zn3.75+Foliar Zn1.25			0.123	0.131	0.159	0.137667			0.1377 abc					10 0.1547 A
			SoilZn2.5+Foliar Zn2.5			0.147	0.127	0.147	0.140333			0.1403 ab					9 0.1527 A
			Soil Zn1.25+Foliar Zn3.75			0.143	0.139	0.151	0.144333			0.1443 ab					8 0.1497 A
			Soil Zn0+ Foliar Zn5			0.144	0.143	0.152	0.146333			0.1463 ab					7 0.1477 AB
			Soil Zn10+Foliar Zn0			0.142	0.153	0.148	0.147667			0.1477 ab					6 0.1463 AB
			Soil Zn7.25+Foliar Zn2.50			0.149	0.154	0.146	0.149667			0.1497 a					5 0.1443 AB
			Soil Zn5.00+Foliar Zn5.00			0.156	0.148	0.154	0.152667			0.1527 a					4 0.1403 AB
			Soil Zn2.50+Foliar Zn7.50			0.151	0.159	0.154	0.154667			0.1547 a					3 0.1377 ABC
			Soil Zn0+ Foliar Zn10	0+10.00		0.149	0.156	0.162	0.155667			0.1557 a					2 0.1303 BC
																	1 0.1213 C

## Sheet: Grain Zn
						Zn in Grains
			Treatment			R1	R2	R3
			Control			0.531	0.506	0.496	0.511				0.5110 a			1 0.5110 A
			Soil Zn5+Foliar Zn0			0.491	0.501	0.495	0.495667				0.4957 a			2 0.4957 A
			Soil Zn3.75+Foliar Zn1.25			0.436	0.457	0.471	0.454667				0.4547 bc			5 0.4627 B
			SoilZn2.5+Foliar Zn2.5			0.454	0.443	0.441	0.446				0.4460 bc			3 0.4547 BC
			Soil Zn1.25+Foliar Zn3.75			0.468	0.457	0.463	0.462667				0.4627 b			7 0.4523 BC
			Soil Zn0+ Foliar Zn5			0.462	0.434	0.452	0.449333				0.4493 bc			6 0.4493 BC
			Soil Zn10+Foliar Zn0			0.459	0.4348	0.463	0.452267				0.4523 bc			4 0.4460 BC
			Soil Zn7.25+Foliar Zn2.50			0.429	0.436	0.457	0.440667				0.4407 c			8 0.4407 C
			Soil Zn5.00+Foliar Zn5.00			0.382	0.393	0.401	0.392				0.3920 d			10 0.3967 D
			Soil Zn2.50+Foliar Zn7.50			0.397	0.404	0.389	0.396667				0.3967 d			11 0.3950 D
			Soil Zn0+ Foliar Zn10	0+10.00		0.396	0.392	0.397	0.395				0.3950 d			9 0.3920 D
										0.0204

## Sheet: Leaf P
						Leaf P
			Treatment			R1	R2	R3	Mean				0.1380 d					11 0.1743 A
			Control			0.134544	0.147	0.132	0.137848				0.1460 cd					10 0.1727 AB
			Soil Zn5+Foliar Zn0			0.148532	0.142	0.147	0.145844				0.1513 bcd					9 0.1707 AB
			Soil Zn3.75+Foliar Zn1.25			0.139	0.159	0.155642	0.151214				0.1600 abcd					8 0.1693 AB
			SoilZn2.5+Foliar Zn2.5			0.159	0.143	0.178	0.16				0.1613 abc					7 0.1647 ABC
			Soil Zn1.25+Foliar Zn3.75			0.189	0.136	0.159	0.161333				0.1647 abc					6 0.1620 ABC
			Soil Zn0+ Foliar Zn5			0.167	0.162	0.157	0.162				0.1647 abc					5 0.1613 ABC
			Soil Zn10+Foliar Zn0			0.157	0.172	0.165	0.164667				0.1693 ab					4 0.1600 ABCD
			Soil Zn7.25+Foliar Zn2.50			0.179	0.177	0.152	0.169333				0.1707 ab					3 0.1513 BCD
			Soil Zn5.00+Foliar Zn5.00			0.179	0.163	0.17	0.170667				0.1727 ab					2 0.1460 CD
			Soil Zn2.50+Foliar Zn7.50			0.182	0.164	0.172	0.172667				0.1743 a					1 0.1380 D
			Soil Zn0+ Foliar Zn10	0+10.00		0.192	0.169	0.162	0.174333

[truncated: 7 more sheets: Leaf K, Leaf Zn, pH, Leaf N, Sheet1, O.M, Protien]
